# Supplementary material for: Matching of Nitrogen Enhancement and Photosynthetic Efficiency by Arbuscular Mycorrhiza in Maize (Zea mays L.) in Relation to Organic Fertilizer Type
Source: MDPI journal article supplement (doi:10.3390/plants11030369), 2022-01-29
Supplement: s1 [file s1]

Supplementary

Table S1. Major nutrients in the organic fertilizers

| Nutrition (%) | Organic fertilizers, O_LT | Organic fertilizers, O_UMJ |
|---------------|---------------------------|----------------------------|
| N             | 4.30                      | 5.08                       |
| P             | 3.80                      | 2.49                       |
| K             | 3.70                      | 0.58                       |
| Ca            | 4.4                       | 2.31                       |
| Mg            | 0.7                       | 1.25                       |
